# Supplementary material for: Mobile Apps for Older Adults: Systematic Search and Evaluation Within Online Stores
Source: PubMed Central journal article supplement (PMC8081158; doi:10.2196/23313), 2021-02-19
Supplement: aging_v4i1e23313_app2.pdf [file aging_v4i1e23313_app2.pdf]

## Multimedia Appendix

**Table 1.** Included mobile apps with name, store, developer, version, price, user star rating, Mobile Application Rating Scale, German version (MARS-G), subdimensions and overall rating sorted by MARS-G overall rating.

| App name                               | App store            | App developer                             | Version | App price | User star | MARS-G     |               |            |             |                |
|----------------------------------------|----------------------|-------------------------------------------|---------|-----------|-----------|------------|---------------|------------|-------------|----------------|
|                                        |                      |                                           |         | in Euro   | rating    | Engagement | Functionality | Aesthetics | Information | Overall rating |
| NeuroNation -<br>Gehirnjogging         | Google Play<br>Store | NeuroNation                               | 3.1.62  | 0.00      | 4.50      | 4.80       | 4.88          | 5.00       | 4.29        | 4.74           |
| Lumosity                               | Google Play<br>Store | Lumos Laps Inc.                           | 22.04   | 0.00      | 4.20      | 4.60       | 4.88          | 4.83       | 4.21        | 4.63           |
| DST - Demenz Test                      | App Store            | Sebastian Dr. Horn                        | 1.3     | 5.49      | 5.00      | 4.20       | 5.00          | 5.00       | 4.00        | 4.55           |
| MindMate                               | App Store            | MindMate LTD                              | 5.5.1   | 0.00      | 5.00      | 4.70       | 4.50          | 4.83       | 4.07        | 4.53           |
| Arznei &<br>Medikamente Alarm          | App Store            | MediSafe Inc.                             | 6.2.10  | 0.00      | 4.50      | 4.20       | 4.63          | 4.17       | 4.21        | 4.30           |
| Constant Therapy                       | Google Play<br>Store | Constant Therapy<br>Inc.                  | 4.9.4   | 0.00      | 4.20      | 4.40       | 4.38          | 4.00       | 4.00        | 4.19           |
| Memory Helper Carer<br>Assistance Tool | Google Play<br>Store | Memory Helper<br>Carer Assistance<br>Tool | 1.0.4   | 0.00      | 4.50      | 4.50       | 4.50          | 4.00       | 3.64        | 4.16           |
| Ada - Deine<br>Gesundheitshelferin     | Google Play<br>Store | Ada Health                                | 2.39.0  | 0.00      | 4.70      | 4.40       | 4.63          | 4.17       | 3.43        | 4.16           |
| Auguste                                | Google Play<br>Store | Vollkorn Games                            | 2.1.5   | 0.00      | 4.50      | 4.50       | 4.63          | 4.83       | 2.50        | 4.11           |

| App name                                                  | App store            | App developer         | Version | App price<br>in Euro | User star<br>rating | MARS-G     |               |            |             |                |
|-----------------------------------------------------------|----------------------|-----------------------|---------|----------------------|---------------------|------------|---------------|------------|-------------|----------------|
|                                                           |                      |                       |         |                      |                     | Engagement | Functionality | Aesthetics | Information | Overall rating |
| Mathe Senioren                                            | App Store            | Nicolas<br>Lehovetzki | 1.1     | 2.29                 | 4.00                | 4.20       | 5.00          | 5.00       | 2.00        | 4.05           |
| Peak - Gehirntraining                                     | Google Play<br>Store | Peaklabs              | 3.26.42 | 0.00                 | 4.40                | 4.40       | 4.38          | 4.00       | 3.21        | 4.00           |
| Senior Safety App,<br>GPS Tracker –<br>Fall Alerts & More | Google Play<br>Store | 97 Technologies       | 9.7     | 0.00                 | 4.00                | 4.60       | 4.25          | 4.00       | 3.00        | 3.96           |
| Brain Monitor:<br>Letters                                 | App Store            | PeqApps               | 1.6     | 0.00                 | 0.00                | 3.70       | 4.50          | 4.50       | 2.93        | 3.91           |
| Familie Suchen - GPS<br>Tracker                           | Google Play<br>Store | Life360               | 18.6.0  | 0.00                 | 4.50                | 3.80       | 4.00          | 4.00       | 3.71        | 3.88           |
| Dementia - Cuomo                                          | App Store            | Cuomo                 | 1.02    | 0.00                 | 0.00                | 3.50       | 4.38          | 4.50       | 2.93        | 3.83           |
| Dementia Risk Tool                                        | Google Play<br>Store | SICS Swedish ICT      | 1.21    | 0.00                 | 4.90                | 2.80       | 4.75          | 4.33       | 3.21        | 3.77           |
| Spiele für Senioren -<br>Trainieren Sie Ihren<br>Geist    | App Store            | Lisbon Labs           | 1.2     | 2.29                 | 2.00                | 4.00       | 4.50          | 5.00       | 1.57        | 3.77           |

| App name                                              | App store            | App developer              | Version | App price | User star | MARS-G     |               |            |             |                |
|-------------------------------------------------------|----------------------|----------------------------|---------|-----------|-----------|------------|---------------|------------|-------------|----------------|
|                                                       |                      |                            |         | in Euro   | rating    | Engagement | Functionality | Aesthetics | Information | Overall rating |
| Trainiere dein Gehirn<br>- Gedächtnisspiele           | Google Play<br>Store | Silver Senior<br>Games     | 2.1.3   | 0.00      | 4.50      | 4.00       | 4.13          | 4.67       | 2.21        | 3.75           |
| Trainiere dein Gehirn<br>- Aufmerksamkeits-<br>spiele | Google Play<br>Store | Senior Games               | 1.2.3   | 0.00      | 4.50      | 3.80       | 4.25          | 4.67       | 2.14        | 3.71           |
| Brain Monitor:<br>Scramble                            | App Store            | PeqApps                    | 1.6     | 0.00      | 0.00      | 4.00       | 3.88          | 4.33       | 2.57        | 3.69           |
| Alzheimer's Life<br>Therapy                           | App Store            | Alzheimer's Light          | 1.3.2   | 0.00      | 5.00      | 4.10       | 4.13          | 3.67       | 2.86        | 3.69           |
| SymptomGuide TM<br>Dementia                           | App Store            | DGI Clinical               | 0.9.0.0 | 0.00      | 0.00      | 3.40       | 4.25          | 4.00       | 3.00        | 3.66           |
| MyTherapy Tabletten<br>Erinnerung                     | App Store            | smartpatient<br>GmbH       | 3.34    | 0.00      | 4.80      | 3.90       | 4.38          | 4.00       | 2.29        | 3.64           |
| Emergency SOS<br>Safety Alert -<br>Personal Alarm App | Google Play<br>Store | appCDM Health &<br>Fitness | 0.25    | 0.00      | 3.40      | 3.00       | 4.38          | 4.17       | 2.86        | 3.60           |

| App name                                               | App store            | App developer             | Version | App price<br>in Euro | User star<br>rating | MARS-G     |               |            |             |                |
|--------------------------------------------------------|----------------------|---------------------------|---------|----------------------|---------------------|------------|---------------|------------|-------------|----------------|
|                                                        |                      |                           |         |                      |                     | Engagement | Functionality | Aesthetics | Information | Overall rating |
| Oscar Senior                                           | App Store            | Oscar Senior s.r.o.       | 3.3.0   | 0.00                 | 3.60                | 4.20       | 4.75          | 4.17       | 1.21        | 3.58           |
| Dementia Guide<br>Expert                               | App Store            | University of<br>Illinois | 1.1.2   | 0.00                 | 0.00                | 3.00       | 4.50          | 3.33       | 3.43        | 3.57           |
| Memory box                                             | Google Play<br>Store | SCI AB                    | 1.7     | 0.00                 | 5.00                | 3.50       | 3.63          | 4.00       | 3.00        | 3.53           |
| Vergrößerungsglas -<br>Lupe app                        | Google Play<br>Store | Aexol                     | 1.6     | 5.49                 | 4.00                | 3.80       | 4.75          | 4.67       | 0.86        | 3.52           |
| Life Begins At ... The<br>Retiree                      | App Store            | Magzter Inc.              | 6.16    | 0.00                 | 0.00                | 3.10       | 4.00          | 4.50       | 2.43        | 3.51           |
| Trainiere dein Gehirn<br>- visuell-räumliche<br>Spiele | App Store            | Senior Games              | 1.1.5   | 0.00                 | 4.50                | 4.00       | 4.25          | 3.83       | 1.79        | 3.47           |
| Activities for care:<br>elderly dementia LD<br>seniors | App Store            | RemindMecare<br>Medical   | 1.0.0   | 0.00                 | 4.90                | 3.40       | 3.25          | 4.67       | 2.50        | 3.45           |
| iHELP Personal &<br>Family Safety                      | App Store            | iHELP                     | 3.5.9   | 0.00                 | 4.50                | 3.60       | 4.13          | 4.17       | 1.86        | 3.44           |

| App name                                         | App store         | App developer                                      | Version | App price | User star | MARS-G     |               |            |             |                |
|--------------------------------------------------|-------------------|----------------------------------------------------|---------|-----------|-----------|------------|---------------|------------|-------------|----------------|
|                                                  |                   |                                                    |         | in Euro   | rating    | Engagement | Functionality | Aesthetics | Information | Overall rating |
| Phantasiereisen für Senioren                     | Google Play Store | start2dream.de                                     | 1.5     | 0.00      | 4.80      | 3.30       | 4.75          | 3.33       | 2.29        | 3.42           |
| EasyTalkerFree                                   | App Store         | Janus Anderson                                     | 1.0     | 0.00      | 0.00      | 2.90       | 3.75          | 4.33       | 2.64        | 3.41           |
| Apotheke vor Ort                                 | App Store         | Wort & Bild Verlag<br>Konradshöhe<br>GmbH & Co. KG | 8.2.5   | 0.00      | 2.60      | 3.60       | 3.63          | 3.50       | 2.86        | 3.40           |
| Dementia Personal Outcomes                       | Google Play Store | Scottish Social Services Council<br>Education      | 2.0     | 0.00      | 0.00      | 2.50       | 3.38          | 4.00       | 3.64        | 3.38           |
| Young Onset Dementia (YOD)                       | App Store         | Leicestershire Partnership NHS<br>Trust with LHS   | 1.0     | 0.00      | 5.00      | 2.70       | 3.25          | 3.83       | 3.71        | 3.37           |
| Dementia 101 - Memory loss and Family Care Guide | App Store         | Xi Zhang                                           | 1.0     | 3.49      | 5.00      | 2.60       | 4.75          | 3.67       | 2.43        | 3.36           |

| App name                                                | App store            | App developer                                                | Version | App price | User star | MARS-G     |               |            |             |                |
|---------------------------------------------------------|----------------------|--------------------------------------------------------------|---------|-----------|-----------|------------|---------------|------------|-------------|----------------|
|                                                         |                      |                                                              |         | in Euro   | rating    | Engagement | Functionality | Aesthetics | Information | Overall rating |
| Senior Fitness –<br>Home workout for old<br>and elderly | Google Play<br>Store | K2 Labs Health &<br>Fitness                                  | 1.1.1   | 0.00      | 4.20      | 3.20       | 3.38          | 3.67       | 3.14        | 3.35           |
| Senior Next                                             | App Store            | Online<br>Connections Inc.                                   | 1.0.23  | 0.00      | 4.00      | 4.10       | 4.38          | 3.67       | 1.21        | 3.34           |
| Spiele für Gedächtnis                                   | Google Play<br>Store | Maple Media                                                  | 3.6.30  | 0.00      | 4.50      | 3.70       | 4.00          | 3.67       | 1.86        | 3.31           |
| Dementia Solutions                                      | Google Play<br>Store | Sunnsoft Medical                                             | 0.5     | 0.00      | 5.00      | 3.50       | 3.50          | 3.50       | 2.71        | 3.30           |
| Wortsuche                                               | Google Play<br>Store | Senior Games                                                 | 1.1.8   | 0.00      | 4.60      | 3.90       | 4.38          | 4.00       | 0.93        | 3.30           |
| HandHelp - Life Care<br>App/ barrierefreier<br>Notruf   | Google Play<br>Store | App-Sec-Network<br>UG                                        | 2.0.1   | 0.00      | 4.30      | 3.40       | 3.50          | 4.00       | 2.00        | 3.23           |
| Dementia Screener                                       | Google Play<br>Store | Bioinformatics<br>Research Group<br>BIRG Health &<br>Fitness | 2.1     | 0.00      | 2.70      | 2.80       | 4.25          | 3.17       | 2.64        | 3.21           |

| App name                                         | App store            | App developer                           | Version | App price | User star | MARS-G     |               |            |             |                |
|--------------------------------------------------|----------------------|-----------------------------------------|---------|-----------|-----------|------------|---------------|------------|-------------|----------------|
|                                                  |                      |                                         |         | in Euro   | rating    | Engagement | Functionality | Aesthetics | Information | Overall rating |
| Rimentia -<br>Gehirntraining                     | Google Play<br>Store | AFASH Apps                              | 1.2     | 0.00      | 4.00      | 3.60       | 4.00          | 4.17       | 0.93        | 3.17           |
| Aphasic,<br>Schlaganfall und<br>Demenz Therapie  | Google Play<br>Store | ImagiRation LLC                         | 5.5.3   | 0.00      | 4.20      | 3.70       | 3.00          | 3.33       | 2.43        | 3.12           |
| Medication  <br>Pill Reminder App                | Google Play<br>Store | Nextscrum Apps                          | 1.0.19  | 0.00      | 4.50      | 3.70       | 3.13          | 3.50       | 2.00        | 3.08           |
| Senior Safety Phone –<br>Big Icons Launcher      | Google Play<br>Store | Deskshare Inc.                          | 2.8     | 0.00      | 3.90      | 3.60       | 4.63          | 3.33       | 0.71        | 3.07           |
| Dementia Info                                    | Google Play<br>Store | Programming Is<br>Fun                   | 1.0     | 0.00      | 0.00      | 2.70       | 3.88          | 3.17       | 2.36        | 3.02           |
| AlerteChute                                      | Google Play<br>Store | Jginformatique                          | 1.0.12  | 18.99     | 4.00      | 3.60       | 4.00          | 3.33       | 1.14        | 3.02           |
| Care and Connect:<br>Dementia Friendly<br>Places | Google Play<br>Store | University of<br>Newcastle upon<br>Tyne | 1.2     | 0.00      | 3.80      | 3.10       | 4.00          | 3.67       | 1.29        | 3.01           |
| SitFit Exercise                                  | App Store            | Candlhat Studios                        | 1.1     | 0.00      | 2.00      | 2.60       | 3.50          | 3.33       | 2.57        | 3.00           |



| App name                                           | App store            | App developer           | Version | App price | User star | MARS-G     |               |            |             |                |
|----------------------------------------------------|----------------------|-------------------------|---------|-----------|-----------|------------|---------------|------------|-------------|----------------|
|                                                    |                      |                         |         | in Euro   | rating    | Engagement | Functionality | Aesthetics | Information | Overall rating |
| 9zest Parkinson-<br>Therapie                       | App Store            | 9zest Inc.              | 3.2.0   | 0.00      | 4.80      | 3.40       | 3.25          | 3.33       | 1.71        | 2.92           |
| Are you okay today                                 | App Store            | HANBUNCO                | 2.2     | 0.00      | 4.10      | 2.80       | 4.75          | 3.17       | 0.79        | 2.88           |
| Senioren<br>Video<br>Überwacher                    | App Store            | Master App<br>Solutions | 2.1     | 6.99      | 4.40      | 2.40       | 3.75          | 4.00       | 1.29        | 2.86           |
| Senior einfaches<br>Telefon                        | Google Play<br>Store | Adcoms                  | 2.0     | 0.00      | 3.70      | 2.00       | 4.38          | 3.67       | 1.36        | 2.85           |
| Dementia Diary                                     | App Store            | Mark Thomas             | 1.3     | 1.09      | 4.00      | 2.40       | 4.38          | 3.33       | 1.29        | 2.85           |
| Alzheimer's<br>Speed of Processing<br>Game - ASPEN | Google Play<br>Store | Tiny Happy Steps        | 1.7.0   | 0.00      | 3.90      | 2.20       | 4.75          | 3.50       | 0.93        | 2.84           |
| Senior Discounts +<br>Coupons Free                 | Google Play<br>Store | Big Books Apps.<br>LLC  | 1.8     | 0.00      | 4.20      | 3.60       | 3.88          | 1.67       | 1.79        | 2.73           |

| App name                                           | App store         | App developer                      | Version | App price | User star | MARS-G     |               |            |             |                |
|----------------------------------------------------|-------------------|------------------------------------|---------|-----------|-----------|------------|---------------|------------|-------------|----------------|
|                                                    |                   |                                    |         | in Euro   | rating    | Engagement | Functionality | Aesthetics | Information | Overall rating |
| Daily Senior Fitness Exercise                      | Google Play Store | EBMACS Health & Fitness            | 1.2     | 0.00      | 3.60      | 2.40       | 4.00          | 3.17       | 1.36        | 2.73           |
| Senior Homescreen                                  | Google Play Store | Endran Personalisation             | 1.2.1   | 0.00      | 3.80      | 2.60       | 4.00          | 3.33       | 0.86        | 2.70           |
| Dementia & Alzheimer's Memory Diagnosis Test: MMSE | Google Play Store | Dementia Analysis Health & Fitness | 1.0     | 0.00      | 3.60      | 2.00       | 4.25          | 3.50       | 0.93        | 2.67           |
| Senior Assist Free                                 | App Store         | RedFlag Technologies               | 1.0     | 0.00      | 4.00      | 3.10       | 3.75          | 2.50       | 1.29        | 2.66           |
| Riesige Tastatur                                   | Google Play Store | Apps Technologies                  | 5.0     | 0.00      | 4.30      | 2.20       | 4.13          | 3.33       | 0.64        | 2.58           |
| Visual Hearing Aid                                 | App Store         | Berry Wing LLC                     | 1.0.4   | 0.00      | 4.10      | 2.80       | 3.88          | 2.83       | 0.79        | 2.57           |
| Senior Chess                                       | Google Play Store | Leen Ammeraal Board                | 2.02    | 0.00      | 4.10      | 3.20       | 3.75          | 2.00       | 1.29        | 2.56           |
| Memory Game Brain for dementia                     | Google Play Store | Team Jin                           | 04.17   | 0.00      | 4.60      | 3.10       | 3.88          | 2.33       | 0.86        | 2.54           |

| App name                                               | App store            | App developer                     | Version | App price | User star | MARS-G     |               |            |             |                |
|--------------------------------------------------------|----------------------|-----------------------------------|---------|-----------|-----------|------------|---------------|------------|-------------|----------------|
|                                                        |                      |                                   |         | in Euro   | rating    | Engagement | Functionality | Aesthetics | Information | Overall rating |
| Sudoku: Senior<br>Puzzle                               | App Store            | zhong chen                        | 1.2     | 0.00      | 4.00      | 2.90       | 3.88          | 2.67       | 0.64        | 2.52           |
| Tastatur für Senioren                                  | Google Play<br>Store | ctpg567                           | 2.2     | 0.00      | 4.00      | 2.50       | 3.63          | 3.17       | 0.79        | 2.52           |
| Exercise Tips For The<br>Elderly                       | App Store            | TrainTech USA.<br>LLC             | 1.0     | 3.49      | 0.00      | 1.90       | 3.63          | 2.50       | 1.86        | 2.47           |
| Senior Menu                                            | Google Play<br>Store | Willem Me                         | 1.0     | 0.00      | 5.00      | 2.80       | 3.38          | 2.83       | 0.86        | 2.47           |
| GROÙE TASTEN<br>SENIOREN<br>TELEFON                    | Google Play<br>Store | Anna G.                           | 1.37    | 0.00      | 3.20      | 2.50       | 3.50          | 3.17       | 0.64        | 2.45           |
| Gedächtnisübung für<br>Alzheimer                       | Google Play<br>Store | Büyük Beyaz<br>Hamsi              | 4.1.0   | 0.00      | 4.40      | 2.40       | 3.88          | 2.50       | 0.93        | 2.43           |
| Accessible<br>Alzheimers and<br>Dementia Care          | App Store            | AHCGLOBAL                         | 1.0     | 0.00      | 0.00      | 1.70       | 3.38          | 2.83       | 1.79        | 2.42           |
| Locate Me –<br>App for children<br>and elderly citizen | Google Play<br>Store | Perfect Fact Maps<br>& Navigation | 1.0.0   | 0.00      | 4.80      | 1.70       | 3.50          | 3.17       | 1.14        | 2.38           |

| App name                                            | App store            | App developer                    | Version | App price | User star | MARS-G     |               |            |             |                |
|-----------------------------------------------------|----------------------|----------------------------------|---------|-----------|-----------|------------|---------------|------------|-------------|----------------|
|                                                     |                      |                                  |         | in Euro   | rating    | Engagement | Functionality | Aesthetics | Information | Overall rating |
| Senioren. Rentner.<br>Demenz. Uhr. App.<br>Kalender | Google Play<br>Store | Aruso                            | 1.0     | 12.99     | 3.00      | 2.80       | 3.13          | 2.83       | 0.71        | 2.37           |
| Senior Safety Phone                                 | App Store            | Contacts by<br>Company. Inc.     | 1.1     | 0.00      | 3.80      | 2.70       | 2.88          | 3.17       | 0.71        | 2.36           |
| Gabble                                              | Google Play<br>Store | Denis E.                         | 1.0.2   | 0.00      | 0.00      | 3.00       | 3.25          | 2.33       | 0.43        | 2.25           |
| Memory Games for<br>Elderly                         | Google Play<br>Store | Nice.Jirayu2554                  | 1.0     | 0.00      | 2.00      | 2.20       | 3.38          | 2.33       | 0.36        | 2.07           |
| Dementia/Digital<br>Diary/Clock                     | Google Play<br>Store | Fashmel Health &<br>Fitness      | 4.2     | 0.00      | 4.40      | 2.60       | 3.13          | 1.33       | 0.64        | 1.93           |
| Dementia Player<br>Demo                             | Google Play<br>Store | Stephen C Adams<br>Music & Audio | 11.0    | 0.00      | 0.00      | 1.90       | 3.63          | 1.00       | 0.93        | 1.86           |
| Dementia_Counter                                    | Google Play<br>Store | Stephen C Adams                  | 2.0     | 0.00      | 0.00      | 1.00       | 1.63          | 2.33       | 0.71        | 1.42           |
